# Supplementary material
Source: Springer Nature journal article supplement (https://www.springermedizin.de/resource/supplementary/12974_2010_357_MOESM6_ESM.pdf/9601482)

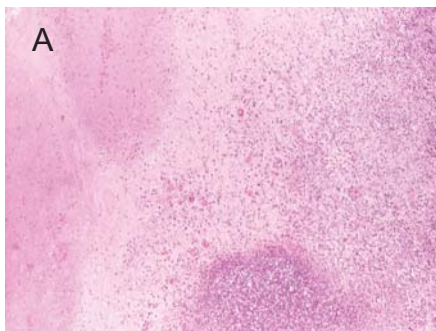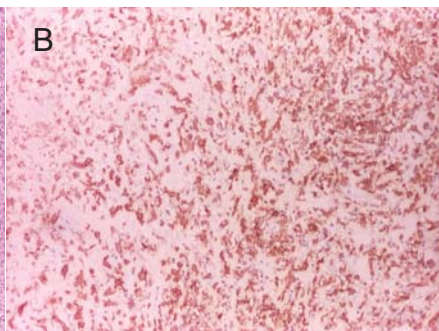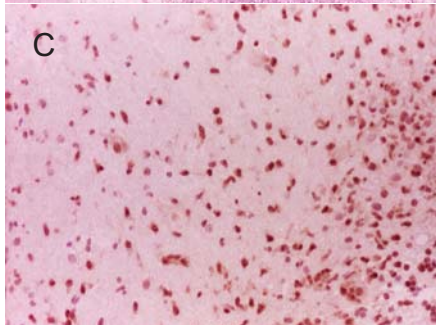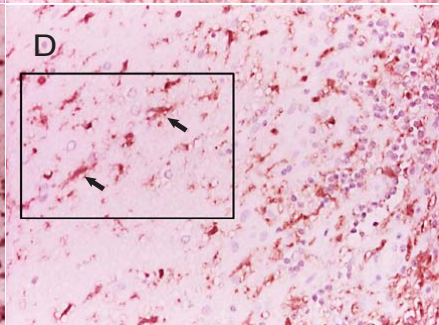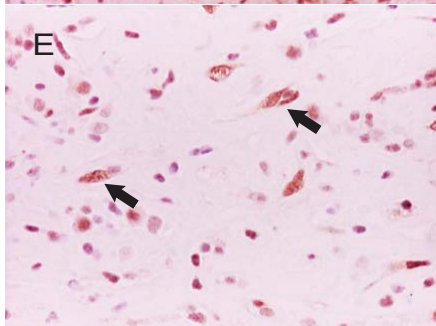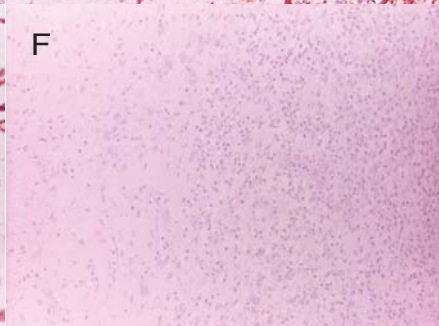

Supplement: MOESM6 [file 9601482]
